# Supplementary material for: Reduced levels of protein recoding by A-to-I RNA editing in Alzheimer's disease
Source: PubMed Central journal article supplement (PMC4712678; doi:10.1261/rna.054627.115), 2016-02
Supplement: supp_054627.115_FigS1.pdf [file supp_054627.115_FigS1.pdf]

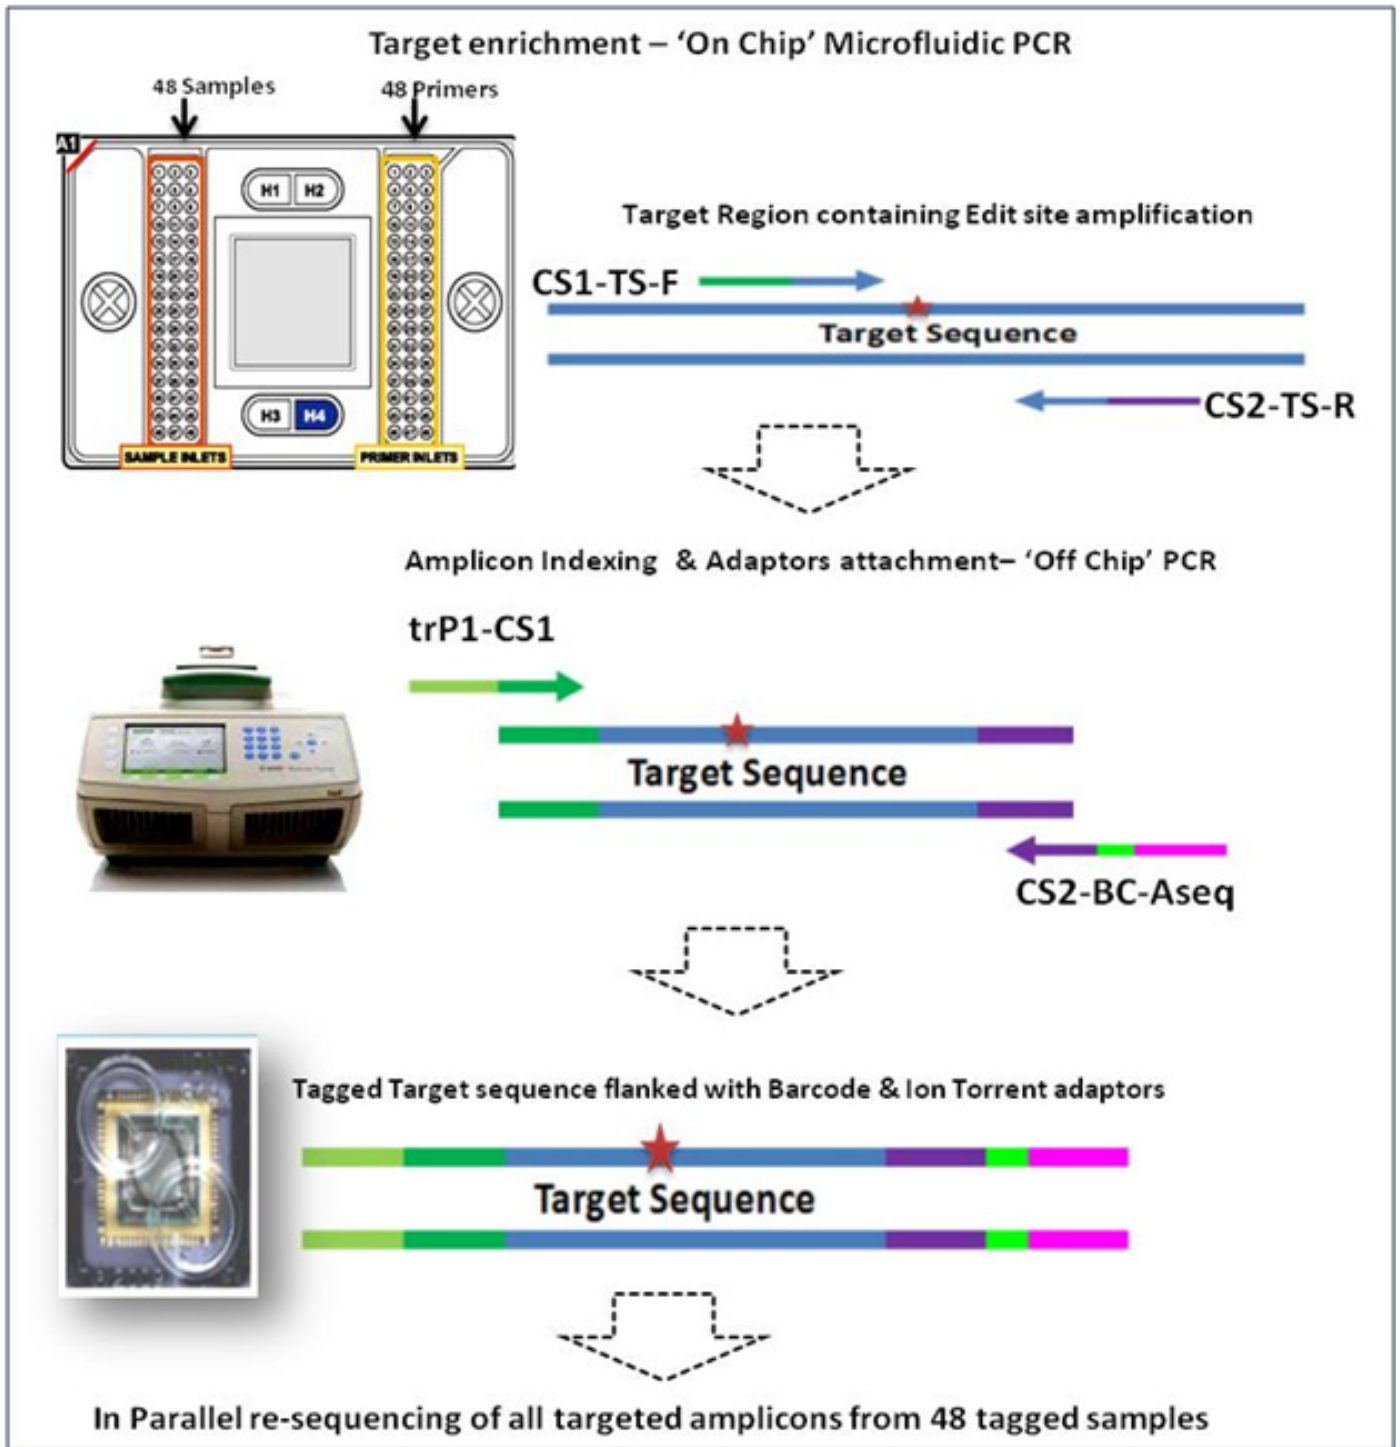

Figure S1
